# Supplementary material for: Hierarchical and ultra-porous copper cobaltite flakes with honeycomb-like physiognomies for highly efficient non-enzymatic glucose sensing
Source: Royal Society of Chemistry journal article supplement (doi:10.1039/d3nj02799f), 2023-01-01
Supplement: d3nj02799f1.pdf [file d3nj02799f1.pdf]

## Supplementary Information

### Hierarchical & ultra-porous copper cobaltite flakes with honeycomb-like physiognomies for highly efficient non-enzymatic glucose sensing

Ruchika Sharma,<sup>a</sup> Siddhant Srivastav<sup>a</sup> and Sumanta Kumar Meher<sup>a\*</sup>

<sup>a</sup>Materials Electrochemistry & Energy Storage Laboratory, Department of Chemistry, Malaviya

National Institute of Technology Jaipur, Jaipur, Rajasthan-302017, India

Email\*: skmeher.chy@mnit.ac.in

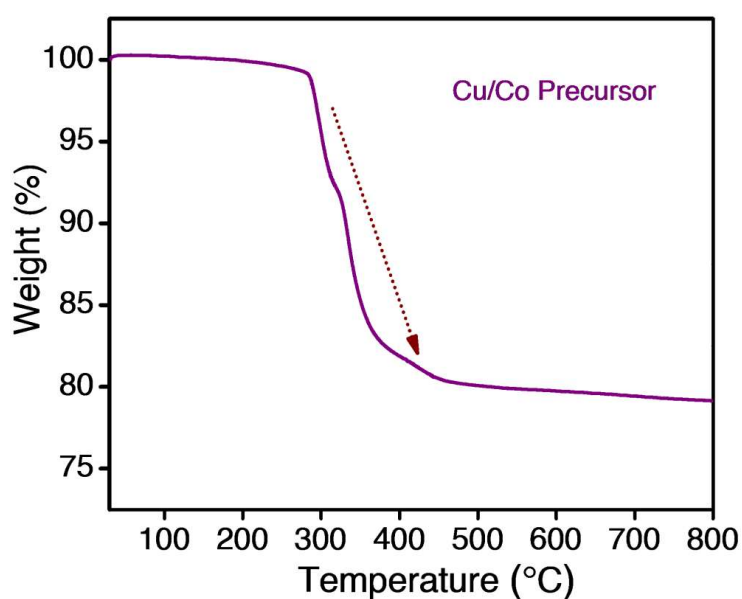

**Fig. S1** TGA profile of the Cu/Co precursor

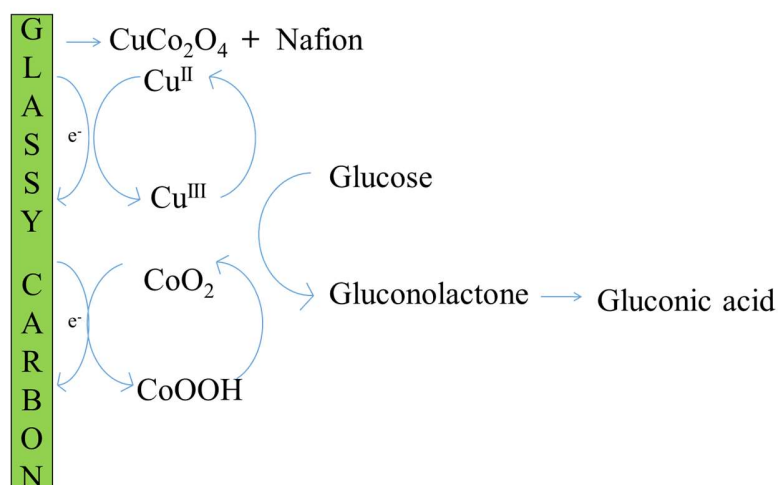

**Scheme S1.** The plausible mechanism during non-enzymatic electrooxidation of glucose to gluconolactone and gluconic acid on flake & honeycomb-like  $\text{CuCo}_2\text{O}_4$  surface in alkaline medium<sup>s1</sup>

**Table S1.** Comparative performance (linear range, limit of detection and sensitivity) data of flake & honeycomb-like  $\text{CuCo}_2\text{O}_4$  with literature reported Cu and Co based electrodes for non-enzymatic electrochemical sensing of glucose

| Electrode Material                         | Linear range (mM) | Limit of detection ( $\mu\text{M}$ ) | Sensitivity ( $\mu\text{A mM}^{-1} \text{cm}^{-2}$ ) | Reference |
|--------------------------------------------|-------------------|--------------------------------------|------------------------------------------------------|-----------|
| $\text{Co}_3\text{O}_4$ -rGO nanocomposite | 0.5-1.2           | 1.8                                  | 1.36                                                 | s2        |
| Cu-x $\text{Cu}_2\text{O}$ nanoparticles   | 0.8-10            | 16                                   | 230.8                                                | s3        |
| Cu NPs @ graphene                          | 4.50              | 1.3                                  | 48.13                                                | s4        |
| $\text{Cu}_2\text{O}$ nanocubes @ graphene | 0.3-3.3           | 3.3                                  | 285                                                  | s5        |
| Cu/ $\text{Cu}_2\text{O}$ @rGO             | 0.005-7           | 0.5                                  | 145.2                                                | s6        |
| Cu/ $\text{Cu}_2\text{O}$ nanoporous NPs   | 0.01-5.5          | 0.05                                 | 123.8                                                | s7        |
| $\text{Cu}_2\text{O}$ /rGO                 | 0.01-6.0          | 0.05                                 | 185.0                                                | s8        |
| Nanodisc like $\text{Co}_3\text{O}_4$      | 0.5-5.0           | 0.8                                  | 27.0                                                 | s9        |
| Nanoflake like $\text{Co}_3\text{O}_4$     | 0.1-5.0           | 0.7                                  | 118.0                                                | s10       |

|                                                            |             |      |        |     |
|------------------------------------------------------------|-------------|------|--------|-----|
| Porous nanowires like Co <sub>3</sub> O <sub>4</sub>       | 0.05-5.7    | 5.0  | 300    | s11 |
| Hollow microspheres like Co <sub>3</sub> O <sub>4</sub>    | 0.02-1.4    | 1.2  | 69     | s12 |
| Co <sub>3</sub> O <sub>4</sub> nanowires                   | 0.01-12     | 0.02 | 46     | s13 |
| Cu <sub>2</sub> O@ZIF-67                                   | 0.01-16.3   | 6.5  | 181.34 | s14 |
| Cu-MOF                                                     | 0.1-3.5     | 2.4  | 89     | s15 |
| Cu nanospheres @ porous carbon                             | 0.001-5.62  | 0.48 | 28.67  | s16 |
| Cu NPs on glass                                            | 0.01-0.2    | 2.47 | 145.5  | s17 |
| Co <sub>3</sub> O <sub>4</sub> nanoplates                  | 0.05-3.2    | 2.7  | 212.92 | s18 |
| NiO-CuO/CFME nanocomposite                                 | 0.001-0.5   | 0.4  | 70     | s19 |
| Co dendrite array film                                     | -           | -    | 359.0  | s20 |
| Cu-Co-rGO                                                  | -           | 0.15 | 240.0  | s21 |
| Cu <sub>2</sub> O biscuit/SPCE                             | 0.0005-4.0  | -    | 309.0  | s22 |
| Porous CuO particles                                       | 0.001-4.3   | 0.25 | 1.163  | s23 |
| Cu <sub>2</sub> O @ CuO @ NiCo <sub>2</sub> O <sub>4</sub> | 0.035-4.5   | 12.0 | 0.112  | s24 |
| CuCo <sub>2</sub> O <sub>4</sub> nanowire arrays           | 0.5-1.0     | 1    | 20.9   | s25 |
| Cu/Ni(OH) <sub>2</sub> nanoboxes                           | 0.00005-5.0 | 0.07 | 487.3  | s26 |
| Porous Co <sub>3</sub> O <sub>4</sub>                      | 0.49-1.92   | 0.16 | 426.0  | s27 |
| 3D Co <sub>3</sub> O <sub>4</sub>                          | 0.001-0.3   | 0.1  | 471    | s28 |
| Cu <sub>2</sub> O vulcan XC-72                             | 0 - 6.0     | 2.4  | 629    | s29 |
| CuO/Ni(OH) <sub>2</sub>                                    | 0.05-8.5    | 0.31 | 598    | s30 |
| Co <sub>3</sub> O <sub>4</sub> /carbon nanotube            | 0- 5.2      | 0.08 | 131.69 | s31 |
| Cu/CuO/ZnO hybrid nanostructures                           | 0.1 to 1    | 18   | 408    | s32 |
| Zn doped Co <sub>3</sub> O <sub>4</sub> film               | 0.005–0.62  | 2    | 193    | s33 |

|                                                         |             |      |        |              |
|---------------------------------------------------------|-------------|------|--------|--------------|
| Cu/CuO/Cu(OH) <sub>2</sub> - polydopamine               | 0.02–20     | 20   | 223.17 | s34          |
| Cu/Cu <sub>2</sub> O aerogels                           | 0.001–5.2   | 0.6  | 195    | s35          |
| 3D rambutan-like CuO/reduced graphene oxide             | 0.0005–3.75 | 0.10 | 52.1   | s36          |
| Flake & honeycomb-like CuCo <sub>2</sub> O <sub>4</sub> | 0-3.2       | 1.5  | 690.0  | Present work |

**Table S2.** Amperometric response of flake & honeycomb-like CuCo<sub>2</sub>O<sub>4</sub> to sequential addition of 1 mmol dm<sup>-3</sup> of various interfering species in 0.15 mol dm<sup>-3</sup> NaOH solution after initial addition of 0.1 mmol dm<sup>-3</sup> of glucose at an applied potential of 0.5 V.

| Interferent        | Current response (%) with respect to glucose <sup>a</sup> |
|--------------------|-----------------------------------------------------------|
| Lactose            | 4.70                                                      |
| Fructose           | 1.76                                                      |
| Ascorbic Acid (AA) | 3.52                                                      |
| Uric Acid (UA)     | 1.17                                                      |
| Dopamine (DA)      | 1.11                                                      |

<sup>a</sup>The current response to 0.1 mol dm<sup>-3</sup> of glucose is 0.017 mA (100%)

**Table S3.** The actual sample markup recovery of glucose using flake & honeycomb-like CuCo<sub>2</sub>O<sub>4</sub> electrode at an applied potential of 0.5 V.

| Sl. No. | Coke sample (mM) | Glucose added (mM) | Glucose recovered (mM) | RSD (%) | Recovery (%) |
|---------|------------------|--------------------|------------------------|---------|--------------|
| 1       | 0.015            | 0.060              | 0.0813                 | 1.31    | 108.40       |
| 2       | 0.015            | 0.135              | 0.1498                 | 1.87    | 99.86        |
| 3       | 0.015            | 0.210              | 0.2290                 | 2.18    | 101.77       |

## Notes and References

- s1 S. K. Meher and G. Ranga Rao, *Nanoscale*, 2013, **5**, 2089–2099.
- s2 Y. Zheng, P. Li, H. Li and S. Chen, *Int. J. Electrochem. Sci.*, 2014, **9**, 7369–7381.
- s3 Z. Khosroshahi, F. Karimzadeh, M. Kharaziha and A. Allafchian, *Mater. Sci. Eng. C.*, 2020, **108**, 110216.
- s4 D. Jiang, Q. Liu, K. Wang, J. Qian, X. Dong, Z. Yang, X. Du and B. Qiu, *Biosens. Bioelectron.*, 2014, **54**, 273–278.
- s5 M. Liu, R. Liu and W. Chen, *Biosens. Bioelectron.*, 2013, **45**, 206–212.
- s6 H. Huo, C. Guo, G. Li, X. Han and C. Xu, *RSC Adv.*, 2014, **4**, 20459–20465.
- s7 Y. Zhao, Y. Li, Z. He and Z. Yan, *RSC Adv.*, 2013, **45**, 2178–2181.
- s8 D. L. Zhou, J.J. Feng, L.Y. Cai, Q.X. Fang, J.R. Chen and A.J. Wang, *Electrochim. Acta.*, 2014, **115**, 103–108.
- s9 R.A. Soomro, A. Nafady, Z.H. Ibupoto, S.T.H. Sherazi, M. Willander and M.I. Abro, *Mater. Sci. Semicond. Process.*, 2015, **34**, 373–381.
- s10 R.A. Soomro, Z.H. Ibupoto, S.T.H. Sherazi, M.I. Abro, M. Willander, S.A. Mahesar and N.H. Kalwar, *Mater. Express*, 2015, **5**, 5437–444.
- s11 L. Kang, D. He, L. Bie and P. Jiang, *Sens. Actuators B*, 2015, **220**, 888–894.
- s12 H. Yin, X. He, Z. Cui and Q. Nie, *Micro Nano Lett.*, 2016, **11**, 151–155.
- s13 K. Khun, Z.H. Ibupoto, X. Liu, V. Beni and M. Willander, *Mater. Sci. Eng. B*, 2015, **194**, 94–100.
- s14 N. Yang, K. Guo, Y. Zhang and C. Xu, *J. Mater. Chem. B*, 2020, **8**, 2856–2861.
- s15 Y. Sun, Y. Li, N. Wang, Q.Q. Xu, L. Xu and M. Lin, *Electroanalysis*, 2018, **30**, 474–478.
- s16 Y. Xie, Y. Song, Y. Zhang, L. Xu, L. Miao, C. Peng and L. Wang, *J. Alloys Compd.*, 2018, **757**, 105–111.
- s17 L. Wang, C. Peng, H. Yang, L. Miao, L. Xu, L. Wang and Y. Song, *J. Mater. Sci.*, 2019, **54**, 1654–1664.
- s18 M. Kang, H. Zhou, N. Zhao and B. Lv, *CrystEngComm*, 2020, **22**, 35–43.
- s19 N. Batvani, M.A. Tehrani, S. Alimohammadi and M.A. Kiani, *Sens. Bio-Sens. Res.*, 2022, **38**, 100532.
- s20 J.Y. Zheng, Z.L. Quan, G. Song, C.W. Kim, H.G. Cha, T.W. Kim, W. Shin, K.J. Lee, M.H. Jung and Y.S. Kang, *J. Mater. Chem.*, 2012, **22**, 12296–12304.

- s21 K. Justice Babu, S. Sheet, Y.S. Lee and G. Gnana Kumar, *ACS Sustain. Chem. Eng.*, 2018, **6**, 1909–1918.
- s22 M. Velmurugan and N. Karikalan, *J. Colloid Interface Sci.*, 2017, **493**, 349–355.
- s23 J. Xu, X. Xiao, J. Zhang, J. Liu, J. Ni, H. Xue and H. Pang, *Part. Part. Syst. Charact.*, 2017, **34**, 1600420.
- s24 R.X. Zhang, P. Yang and Y.X. Zhang, *Mater. Lett.*, 2020, **272**, 127850.
- s25 F. Liu, Y. Zhuang, M. Guo, Y. Chen, J. Tu and L. Ding, *Sensors*, 2018, **18**, 1131.
- s26 J. Nai, S. Wang, Y. Bai and L. Guo, *Small*, 2013, **9**, 3147–3152.
- s27 Y. Song, J. He, H. Wu, X. Li, J. Yu, Y. Zhang and L. Wang, *Electrochim. Acta*, 2015, **182**, 165–172.
- s28 L. Han, D.P. Yang and A. Liu, *Biosens. Bioelectron.*, 2015, **63**, 145–152.
- s29 K.El. Khatib and R.A. Hameed, *Biosens. Bioelectron.*, 2011, **26**, 3542–3548.
- s30 S. Sun, N. Shi, X. Liao, B. Zhang, G. Yin, Z. Huang, X. Chen and X. Pu, *Appl. Surf. Sci.*, 2020, **529**, 147067.
- s31 X. Li, K. Ren, M. Zhang, W. Sang, D. Sun, T. Hu and Z. Ni, *Sens. Actuators B*, 2019, **293**, 122–128.
- s32 J. Zheng, W. Zhang, Z. Lin, C. Wei, W. Yang, P. Dong, Y. Yan and S. Hu, *J. Mater. Chem. B*, 2016, **4**, 1247–1253.
- s33 M. Chowdhury, F. Cummings, M. Kebede and V. Fester, *Electroanalysis*, 2017, **29**, 578–586.
- s34 P. Viswanathan, J. Park, D.-K. Kang and J.-D. Hong, *Colloids Surf. A*, 2019, **580**, 123689.
- s35 Y. Gao, F. Yang, Q. Yu, R. Fan, M. Yang, S. Rao, Q. Lan, Z. Yang and Z. Yang, *Microchim. Acta*, 2019, **186**, 1–9.
- s36 S. Yoon, A. Ramadoss, B. Saravanakumar and S.J. Kim, *J. Electroanal. Chem.*, 2014, **717**, 90–95.
